# Supplementary material
Source: Springer Nature journal article supplement (https://www.springermedizin.de/resource/supplementary/12916_2010_318_MOESM1_ESM.pdf/9599628)
Supplement: MOESM1 [file 9599628]

**Google Search Engine**  
Those included:  
July 2009  
Websites Retrieved (First 20 from each of the five search terms entered into search engine)  
Total: 100 Websites (20 x 5 terms)

**Yahoo Search Engine**  
Those included:  
July 2009  
Websites Retrieved (First 20 from each of the five search terms entered into search engine)  
Total: 100 Websites (20 x 5 terms)

**MSN Search Engine**  
Those included:  
July 2009  
Websites Retrieved (First 20 from each of the five search terms entered into search engine)  
Total: 100 Websites (20 x 5 terms)

**Combined Total n = 300**

Removed

**n = 271**  
Included after exclusion criteria

Removed

**n = 161**  
Total # of websites included in study

**Exclusion Criteria**  
1) Websites unrelated to pain.  
2) Websites only providing a list of website links  
3) Sponsored links and banner advertisements  
4) For profit websites ONLY if there only intention was to sell a product, if the site promised quick and unrealistic dramatic results, made claims that one remedy will cure a variety of illnesses through some miraculous breakthrough or used sensational writing.

Repeat websites were removed from all the n=271
